# Supplementary material for: Oxidative Stress Biomarkers in the Relationship between Type 2 Diabetes and Air Pollution
Source: Antioxidants (Basel). 2021 Jul 30;10(8):1234. doi: 10.3390/antiox10081234 (PMC8388875; doi:10.3390/antiox10081234)
Supplement: Supplementary file 1 [file antioxidants-10-01234-s001.zip › antioxidants-1324394-supplementary.pdf]

**Table S1.** Characteristics of included studies and main results reported in systematic reviews and meta-analyses evaluating the association between exposure to air pollutants and T2D risk

| Study design                                    | Study period/<br>Countries                                                          | Sample size/<br>Age    | Case<br>number | Outcome<br>assessment                                                                                                                                                                                     | Pooled risk estimates<br>(95%CI)                                                                                                                                                                                                                                                                                                                                                                                                             | Confounders                                                                                                                                                                                                                                                                                                                                                                                                                                                                                                                                                                                                                          | Reference |
|-------------------------------------------------|-------------------------------------------------------------------------------------|------------------------|----------------|-----------------------------------------------------------------------------------------------------------------------------------------------------------------------------------------------------------|----------------------------------------------------------------------------------------------------------------------------------------------------------------------------------------------------------------------------------------------------------------------------------------------------------------------------------------------------------------------------------------------------------------------------------------------|--------------------------------------------------------------------------------------------------------------------------------------------------------------------------------------------------------------------------------------------------------------------------------------------------------------------------------------------------------------------------------------------------------------------------------------------------------------------------------------------------------------------------------------------------------------------------------------------------------------------------------------|-----------|
| 5 cohort,<br>4 cross-sectional,<br>1 ecological | 1989-2010<br>Canada, US,<br>Denmark, The<br>Netherlands,<br>Germany,<br>Switzerland | 506,157<br>≥21 years   | 34,152         | Self-reported diabetes, doctor-diagnosed T2D, hospital discharge/admission for T2D, anti-diabetic medications, elevated FBG or RBG levels, elevated plasma glucose levels after OGTT, T2D symptoms        | T2D incidence<br><i>NO</i> <sub>2</sub><br>HR: 1.13 (1.01-1.22)<br><i>PM</i> <sub>2.5</sub><br>HR: 1.11 (1.03-1.20)                                                                                                                                                                                                                                                                                                                          | Age, sex, race, BMI, waist-to-hip ratio, obesity, hypertension, hypercholesterolemia, previous myocardial infarction, high hsCRP, dyslipidemia, lifestyle characteristics, physical activity, fruit consumption, fat consumption, diet, smoking, alcohol consumption, marital status, educational level, health insurance, per capita income, number of people in the household, environmental tobacco smoke, noise, heating with fossil fuels, workplace exposure with dust/fumes, extreme temperatures, neighborhood socioeconomic index, population density, latitude, urban residency, state of residence, season, calendar year | 24        |
| 6 prospective<br>cohort                         | 1989-2010<br>Canada, US,<br>Germany,<br>Denmark                                     | 209,057<br>21-69 years | 14,029         | National diabetes data/registers, self-reported physician diagnosis, elevated plasma glucose levels, T2D symptoms, hypoglycemic medications                                                               | T2D incidence<br><i>PM</i> <sub>2.5</sub><br>HR: 1.11 (1.03-1.19)<br>for a 10 µg/m <sup>3</sup> increase                                                                                                                                                                                                                                                                                                                                     | Age, sex, race, BMI, waist-to-hip ratio, hypertension, fruit, fat, diet, physical activity, education, smoking, alcohol, income, heating w/fossil fuels, workplace exposure w/dust fumes, extreme temperature, neighborhood socioeconomic index, residence state, urban residency, season, calendar year                                                                                                                                                                                                                                                                                                                             | 25        |
| 10 prospective<br>cohort                        | 1989-2010<br>Canada, US,<br>Germany,<br>Denmark,<br>Switzerland                     | 2,371,907<br>≥21 years | 21,095         | Hospital admission, mortality from diabetes, intake of any anti-diabetic medication, reimbursement for chiropody due to diabetes, self-report of doctor diagnosed T2D, glucose blood test, elevated HbA1c | T2D incidence<br><i>PM</i> <sub>2.5</sub><br>RR: 1.28 (1.06-1.55)<br>Males RR: 1.30 (0.95-1.77)<br>Females RR: 1.28 (1.10-1.50)<br>per 10 µg/m <sup>3</sup> increment<br><i>PM</i> <sub>10</sub><br>RR: 1.15 (1.02-1.30)<br>Males RR: 1.03 (0.96-1.10)<br>Females RR: 1.09 (1.02-1.15)<br>per 10 µg/m <sup>3</sup> increment<br><i>NO</i> <sub>2</sub><br>RR: 1.12 (1.02-1.23)<br>Males RR: 1.03 (0.96-1.10)<br>Females RR: 1.09 (1.02-1.15) | Age, sex, race/ethnicity, BMI, waist-to-hip ratio, hypertension, hsCRP, history of T2D, dyslipidemia, cholesterol, physical activity, fruit consumption, fat consumption, diet, smoking, alcohol consumption, educational level, occupational level, income, number of people in the household, environmental tobacco smoke, noise, annual mean concentration of <i>PM</i> <sub>2.5</sub> , workplace exposure with dust/fumes, extreme temperatures, neighborhood socioeconomic index, city of residence, season, calendar year                                                                                                     | 26        |

| Study design                                          | Study period/<br>Countries                                                                                                        | Sample size/<br>Age      | Case<br>number | Outcome<br>assessment                                                                                                                                                                                                                                                                                       | Pooled risk estimates<br>(95%CI)                                                                                                                                                                                                                                                                                                                                 | Confounders                                                                                                                                                                                                                                                                                                                                                                                                                                                                                                                                                                                                                                   | Reference |
|-------------------------------------------------------|-----------------------------------------------------------------------------------------------------------------------------------|--------------------------|----------------|-------------------------------------------------------------------------------------------------------------------------------------------------------------------------------------------------------------------------------------------------------------------------------------------------------------|------------------------------------------------------------------------------------------------------------------------------------------------------------------------------------------------------------------------------------------------------------------------------------------------------------------------------------------------------------------|-----------------------------------------------------------------------------------------------------------------------------------------------------------------------------------------------------------------------------------------------------------------------------------------------------------------------------------------------------------------------------------------------------------------------------------------------------------------------------------------------------------------------------------------------------------------------------------------------------------------------------------------------|-----------|
|                                                       |                                                                                                                                   |                          |                |                                                                                                                                                                                                                                                                                                             | per 10 µg/m <sup>3</sup> increment                                                                                                                                                                                                                                                                                                                               |                                                                                                                                                                                                                                                                                                                                                                                                                                                                                                                                                                                                                                               |           |
| 5 longitudinal,<br>2 cross-sectional,<br>1 ecological | 1989-2010<br>Canada, US,<br>Denmark, The<br>Netherlands,<br>Germany                                                               | 312,233<br>≥21 years     | 20,372         | Self-reported diabetes,<br>physician diagnosed T2D,<br>county level detection T2D<br>health survey data,<br>national diabetes<br>data/registers, laboratory-<br>based diagnosis for<br>undetected cases                                                                                                     | T2D incidence<br><i>PM</i> <sub>2.5</sub><br>RR: 1.10 (1.02-1.18)<br>Males RR: 1.04 (0.93-1.17)<br>Females RR: 1.14 (1.03-1.26)<br>per 10 µg/m <sup>3</sup> increment<br><i>NO</i> <sub>2</sub><br>RR: 1.08 (1.00-1.18)<br>Males RR: 0.99 (0.93-1.07)<br>Females RR: 1.15 (1.05-1.27)<br>per 10 µg/m <sup>3</sup> increment                                      | Age, sex, race, BMI, waist-to-hip ratio,<br>obesity, hypertension, hypercholesterolemia,<br>previous myocardial infarction, lifestyle<br>characteristics, physical activity, fruit<br>consumption, fat consumption, diet,<br>smoking, alcohol consumption, marital<br>status, educational level, health insurance,<br>per capita income, number of people in the<br>household, environmental tobacco smoke,<br>heating with fossil fuels, workplace exposure<br>with dust/fumes, extreme temperatures,<br>neighborhood socioeconomic index,<br>population density, latitude, urban<br>residency, state of residence, season, calendar<br>year | 31        |
| 7 prospective<br>cohort                               | 1989-2013<br>Canada, US,<br>Germany                                                                                               | 2,339,859<br>25-84 years | 23,639         | National diabetes<br>data/registers, health<br>administrative data,<br>mortality from diabetes,<br>hospital admission with a<br>diagnosis of diabetes, self-<br>report of doctor-diagnosed<br>of T2D, elevated fasting<br>glucose level, treatment<br>with hypoglycemic<br>medication, diabetes<br>symptoms | T2D incidence<br><i>PM</i> <sub>2.5</sub><br>RR: 1.25 (1.10-1.43)<br>per 10 µg/m <sup>3</sup> increment                                                                                                                                                                                                                                                          | Age, sex, race/ethnicity, BMI, hypertension,<br>history of T2D, lifestyle characteristics,<br>physical activity, diet, smoking, alcohol<br>consumption, annual mean concentration of<br><i>PM</i> <sub>2.5</sub> , educational level, occupational level,<br>state of residence, season, calendar year,<br>number of people in the household                                                                                                                                                                                                                                                                                                  | 32        |
| 17 cohort,<br>12 cross-sectional,<br>1 ecological     | 1999-2014<br>Canada, US, Italy,<br>France, Germany,<br>Denmark,<br>Switzerland, The<br>Netherlands,<br>China, Korea,<br>Australia | 32,455,963<br>≥18 years  | 6,529,770      | Health administrative<br>data, self-report, screening,<br>physician<br>examination/diagnosed<br>T2D, elevate fasting<br>glucose or HbA1c, 2-h<br>OGTT, questionnaires,<br>antidiabetes medications,<br>hospitalization records,<br>health survey data,<br>national diabetes<br>data/registers               | T2D prevalence<br><i>PM</i> <sub>2.5</sub><br>OR: 1.09 (1.05-1.13)<br>Males OR: 1.10 (1.05-1.15)<br>Females OR: 1.14 (1.05-1.24)<br><i>PM</i> <sub>10</sub><br>OR: 1.12 (1.06-1.19)<br>Males OR: 1.14 (1.07-1.21)<br>Females OR: 1.10 (0.97-1.25)<br><i>NO</i> <sub>2</sub><br>OR: 1.05 (1.03-1.08)<br>Males OR: 1.05 (1.01-1.0)<br>Females OR: 1.03 (1.00-1.06) | Age, sex, place of birth, race, BMI, waist-to-<br>hip ratio, obesity, hypertension, family,<br>history of T2D, hypercholesterolemia,<br>previous myocardial infarction, stroke,<br>ischemic heart disease, congestive heart<br>failure, chronic lung disease, asthma, COPD,<br>cancer, estimated glomerular filtration rate,<br>high hsCRP, dyslipidemia, medication taken,<br>use of an angiotensin-converting enzyme<br>inhibitor or angiotensin receptor blocker,<br>number of admissions to hospital before<br>beginning of follow-up, how many times<br>serum creatinine was measured before                                             | 33        |

| Study design                                                                          | Study period/<br>Countries                                                                                                                                                          | Sample size/<br>Age | Case<br>number | Outcome<br>assessment                                                                                                                                                                                                                                                                                                  | Pooled risk estimates<br>(95%CI)                                                                                                                                                                                                                                                                                                                                                                                    | Confounders                                                                                                                                                                                                                                                                                                                                                                                                                                                                                                                                                                                                                                                                                                                                                                                                                                                                                                             | Reference |
|---------------------------------------------------------------------------------------|-------------------------------------------------------------------------------------------------------------------------------------------------------------------------------------|---------------------|----------------|------------------------------------------------------------------------------------------------------------------------------------------------------------------------------------------------------------------------------------------------------------------------------------------------------------------------|---------------------------------------------------------------------------------------------------------------------------------------------------------------------------------------------------------------------------------------------------------------------------------------------------------------------------------------------------------------------------------------------------------------------|-------------------------------------------------------------------------------------------------------------------------------------------------------------------------------------------------------------------------------------------------------------------------------------------------------------------------------------------------------------------------------------------------------------------------------------------------------------------------------------------------------------------------------------------------------------------------------------------------------------------------------------------------------------------------------------------------------------------------------------------------------------------------------------------------------------------------------------------------------------------------------------------------------------------------|-----------|
|                                                                                       |                                                                                                                                                                                     |                     |                |                                                                                                                                                                                                                                                                                                                        | T2D incidence<br><i>PM</i> <sub>2.5</sub><br>HR: 1.10 (1.04-1.16)<br>Males HR: 1.05 (1.01-1.08)<br>Females HR: 1.12 (1.03-1.21)<br><i>PM</i> <sub>10</sub><br>HR: 1.05 (0.98-1.13)<br>Males HR: 1.08 (0.92-1.27)<br>Females HR: 1.07 (0.97-1.19)<br>NO <sub>2</sub><br>HR: 1.02 (0.99-1.05)<br>Males HR: 0.98 (0.96-1.00)<br>Females HR: 1.05 (0.99-1.11)                                                           | beginning of follow-up lifestyle characteristics, physical activity, fruit consumption, fat consumption, diet, smoking status and pack-years,, alcohol/sugar-sweetened soft drinking consumption, marital status, educational level, occupational status/unemployment rate, health insurance, per capita/household income, number of people in the household, environmental tobacco smoke, traffic noise annoyance ozone, heating with indoor combustion, workplace exposure with dust/fumes, type of heating energy, type of cooking energy, extreme temperatures, neighborhood socioeconomic index, census track data on median household income, percent of households living below the poverty line, neighborhood level recent immigrants, population density, prevalence of age≥65, latitude, urban residency, state of residence, region, urbanity, season, calendar year                                         |           |
| 20 cohort,<br>21 cross-sectional,<br>2 ecological, 1 case-crossover,<br>1 time-series | 1991-2015<br>Canada, US, Italy,<br>France, Germany,<br>Denmark,<br>Switzerland, The<br>Netherlands,<br>United Kingdom,<br>China, Korea,<br>Taiwan, Australia,<br>Saudi Arabia, Iran | 32,798,442          | 6,518,915      | Health administrative data, self-reported or registered, self-report of doctor-diagnosed diabetes, screening, physician examination/diagnosed T2D, elevate fasting glucose or HbA1c, 2-h OGTT, questionnaires, antidiabetes medications, hospitalization records, health survey data, national diabetes data/registers | T2D prevalence<br><i>PM</i> <sub>2.5</sub><br>OR: 1.10 (1.04-1.17)<br><i>PM</i> <sub>10</sub><br>OR: 1.11 (1.00-1.22)<br>NO <sub>2</sub><br>OR: 1.01 (0.99-1.02)<br>per 10 µg/m <sup>3</sup> increment<br><br>T2D incidence<br><i>PM</i> <sub>2.5</sub><br>HR: 1.08 (1.04-1.12)<br><i>PM</i> <sub>10</sub><br>HR: 1.10 (1.03-1.17)<br>NO <sub>2</sub><br>HR: 1.07 (1.04-1.11)<br>per 10 µg/m <sup>3</sup> increment | Age, sex, place of birth, race, BMI, waist-to-hip ratio, obesity, diastolic blood pressure, hypertension, family, history of T2D, hypercholesterolemia, previous myocardial infarction, stroke, ischemic heart disease, congestive heart failure, chronic lung disease, asthma, COPD, cancer, estimated glomerular filtration rate, high hsCRP, dyslipidemia, medication taken, use of an angiotensin-converting enzyme inhibitor or angiotensin receptor blocker, number of admissions to hospital before beginning of follow-up, how many times serum creatinine was measured before beginning of follow-up lifestyle characteristics, physical activity, fruit consumption, fat consumption, diet, vegetable/fruit diet pattern, meat/fried food diet pattern, smoking status and pack-years, alcohol/sugar-sweetened soft drinking consumption, marital status, educational level, occupational status/unemployment | 23        |

| Study design                                 | Study period/<br>Countries                              | Sample size/<br>Age     | Case<br>number | Outcome<br>assessment                                                                                                                                                              | Pooled risk estimates<br>(95%CI)                                                                                                                                                                                                                                                                                                                                   | Confounders                                                                                                                                                                                                                                                                                                                                                                                                                                                                                                                                                                                                                                      | Reference |
|----------------------------------------------|---------------------------------------------------------|-------------------------|----------------|------------------------------------------------------------------------------------------------------------------------------------------------------------------------------------|--------------------------------------------------------------------------------------------------------------------------------------------------------------------------------------------------------------------------------------------------------------------------------------------------------------------------------------------------------------------|--------------------------------------------------------------------------------------------------------------------------------------------------------------------------------------------------------------------------------------------------------------------------------------------------------------------------------------------------------------------------------------------------------------------------------------------------------------------------------------------------------------------------------------------------------------------------------------------------------------------------------------------------|-----------|
|                                              |                                                         |                         |                |                                                                                                                                                                                    |                                                                                                                                                                                                                                                                                                                                                                    | rate, health insurance, per capita/household income, number of people in the household, environmental tobacco smoke, traffic noise annoyance ozone, heating with indoor combustion, workplace exposure with dust/fumes or organic solvents, type of heating energy, type of cooking energy, extreme temperatures, relative humidity, neighborhood socioeconomic index, census track data on median household income, percent of households living below the poverty line, neighborhood level recent immigrants, population density, prevalence of age≥65, latitude, urban residency, state of residence, region, urbanity, season, calendar year |           |
| 2 cohort, 5 time-series,<br>5 case-crossover | 1984-2005<br>Canada, US, Italy, Denmark, China          | 11,120,555<br>≥25 years | 587,415        | Death certificates, mortality data from hospital admissions, administrative/mortality database                                                                                     | T2D mortality<br><i>PM</i> <sub>2.5</sub><br>RR: 1.123 (1.036-1.217)<br><i>PM</i> <sub>10</sub><br>RR: 1.008 (1.004-1.013)<br><i>NO</i> <sub>2</sub><br>RR: 1.024 (1.007-1.041)<br>per 10 µg/m <sup>3</sup> increment<br><i>O</i> <sub>3</sub><br>RR: 1.065 (1.017-1.115)<br>per IQR increment                                                                     | Age, sex, BMI, waist-to-hip ratio, physical activity, hypertension, hypercholesterolemia, fruit/vegetable consumption, fat consumption, smoking status and pack-years, alcohol consumption, educational level, unemployment rate, per capita income, workplace exposure with dust/fumes, environmental tobacco smoke, seasonal, sub-seasonal variations, meteorological conditions, days of the week, temperature, humidity, pressure, calendar year                                                                                                                                                                                             | [34]      |
| 6 cohort, 6 case-crossover, 5 time-series    | 1984-2006<br>Canada, US, Italy, Denmark, Germany, China | 4,924,514<br>≥21 years  | 1,254,982      | Hospital discharge for T2D, self-reported diabetes, doctor-diagnosed T2D, elevated FBG or RBG levels, elevated plasma glucose levels after OGTT, administrative/mortality database | T2D morbidity/mortality<br><i>PM</i> <sub>2.5</sub><br>RR/MRR: 1.05 (0.99-1.10)<br><i>PM</i> <sub>10</sub><br>RR/MRR: 1.01 (1.003-1.013)<br><i>NO</i> <sub>2</sub><br>RR/MRR: 1.04 (1.01-1.08)<br><i>O</i> <sub>3</sub><br>RR/MRR: 1.07 (1.05-1.09)<br><i>SO</i> <sub>2</sub><br>RR/MRR: 1.05 (1.012-1.079)<br><i>SO</i> <sub>4</sub><br>RR/MRR: 1.04 (1.02-1.079) | Age, sex, race, BMI, waist-to-hip ratio, hypertension, family history of diabetes, hypercholesterolemia, previous myocardial infarction, physical activity, fruit consumption, fat consumption, diet, smoking intensity, alcohol consumption, marital status, educational level, occupational level, environmental tobacco smoke, heating with fossil fuels, workplace exposure with dust/fumes, extreme temperatures, neighborhood socioeconomic index, season, calendar year, time, population changes/density, meteorological conditions, days of the week temperature, humidity, barometric pressure                                         | 35        |

Abbreviations: BMI: body mass index; 95%CI: 95% confidence interval; COPD: chronic obstructive pulmonary disease; FBG: fasting blood glucose; HbA1c: hemoglobin A1c; HR: hazard ratio; hsCRP: hypersensitive C-reactive protein defined as CRP level > sample median(1.0mmol/l); IQR: interquartile range; MRR: mortality rate ratio; NO<sub>2</sub>: nitrogen dioxide; NO<sub>x</sub>: nitrogen oxides; O<sub>3</sub>: ozone; OGTT: oral glucose tolerance test; OR: odd ratio; PM<sub>2.5</sub>: fine inhalable particles, with diameters that generally 2.5 micrometers and smaller; PM<sub>10</sub>: inhalable particles, with diameters that are 10 micrometers and smaller; RBG: random blood glucose; RR: relative risk; SO<sub>2</sub>: sulfur dioxide; SO<sub>4</sub>: sulfate T2D: type 2 diabetes
